# Supplementary material for: Contact & connect—an intervention to reduce depression stigma and symptoms in construction workers: protocol for a randomised controlled trial
Source: Springer Nature journal article supplement (doi:10.1186/s12889-015-2394-x), 2015-10-16
Supplement: MOESM1 [file 9750628]

## Supplementary Document: CONSORT 2010 checklist.

| Section/Topic                           | Item No | Checklist item                                                                                                                                                                              | Reported on page No |
|-----------------------------------------|---------|---------------------------------------------------------------------------------------------------------------------------------------------------------------------------------------------|---------------------|
| <b>Title and abstract</b>               |         |                                                                                                                                                                                             |                     |
|                                         | 1a      | Identification as a randomised trial in the title                                                                                                                                           | 1                   |
|                                         | 1b      | Structured summary of trial design, methods, results, and conclusions (for specific guidance see CONSORT for abstracts)                                                                     | 2                   |
| <b>Introduction</b>                     |         |                                                                                                                                                                                             |                     |
| Background and objectives               | 2a      | Scientific background and explanation of rationale                                                                                                                                          | 4                   |
|                                         | 2b      | Specific objectives or hypotheses                                                                                                                                                           | 7                   |
| <b>Methods</b>                          |         |                                                                                                                                                                                             |                     |
| Trial design                            | 3a      | Description of trial design (such as parallel, factorial) including allocation ratio                                                                                                        | 5                   |
|                                         | 3b      | Important changes to methods after trial commencement (such as eligibility criteria), with reasons                                                                                          | 7                   |
| Participants                            | 4a      | Eligibility criteria for participants                                                                                                                                                       | 7                   |
|                                         | 4b      | Settings and locations where the data were collected                                                                                                                                        | 8                   |
| Interventions                           | 5       | The interventions for each group with sufficient details to allow replication, including how and when they were actually administered                                                       | 7&8                 |
| Outcomes                                | 6a      | Completely defined pre-specified primary and secondary outcome measures, including how and when they were assessed                                                                          | 9                   |
|                                         | 6b      | Any changes to trial outcomes after the trial commenced, with reasons                                                                                                                       | 9                   |
| Sample size                             | 7a      | How sample size was determined                                                                                                                                                              | 9&10                |
|                                         | 7b      | When applicable, explanation of any interim analyses and stopping guidelines                                                                                                                | N/A                 |
| <b>Randomisation:</b>                   |         |                                                                                                                                                                                             |                     |
| <i>Sequence generation</i>              | 8a      | Method used to generate the random allocation sequence                                                                                                                                      | 5                   |
|                                         | 8b      | Type of randomisation; details of any restriction (such as blocking and block size)                                                                                                         | 5                   |
| <i>Allocation concealment mechanism</i> | 9       | Mechanism used to implement the random allocation sequence (such as sequentially numbered containers), describing any steps taken to conceal the sequence until interventions were assigned | 5                   |
| <i>Implementation</i>                   | 10      | Who generated the random allocation sequence, who enrolled participants, and who assigned participants to interventions                                                                     | 5                   |
| Blinding                                | 11a     | If done, who was blinded after assignment to interventions (for example, participants, care providers, those assessing outcomes) and how                                                    | 6                   |
|                                         | 11b     | If relevant, description of the similarity of interventions                                                                                                                                 | N/A                 |
| Statistical methods                     | 12a     | Statistical methods used to compare groups for primary and secondary outcomes                                                                                                               | 10                  |
|                                         | 12b     | Methods for additional analyses, such as subgroup analyses and adjusted analyses                                                                                                            | 10                  |

|                                                         |     |                                                                                                                                                   |                  |
|---------------------------------------------------------|-----|---------------------------------------------------------------------------------------------------------------------------------------------------|------------------|
| <b>Results</b>                                          |     |                                                                                                                                                   |                  |
| Participant flow<br>(a diagram is strongly recommended) | 13a | For each group, the numbers of participants who were randomly assigned, received intended treatment, and were analysed for the primary outcome    | 5&9 <sup>1</sup> |
|                                                         | 13b | For each group, losses and exclusions after randomisation, together with reasons                                                                  | N/A <sup>1</sup> |
| Recruitment                                             | 14a | Dates defining the periods of recruitment and follow-up                                                                                           | 11               |
|                                                         | 14b | Why the trial ended or was stopped                                                                                                                | N/A <sup>2</sup> |
| Baseline data                                           | 15  | A table showing baseline demographic and clinical characteristics for each group                                                                  | N/A <sup>2</sup> |
| Numbers analysed                                        | 16  | For each group, number of participants (denominator) included in each analysis and whether the analysis was by original assigned groups           | N/A <sup>2</sup> |
| Outcomes and estimation                                 | 17a | For each primary and secondary outcome, results for each group, and the estimated effect size and its precision (such as 95% confidence interval) | N/A <sup>2</sup> |
|                                                         | 17b | For binary outcomes, presentation of both absolute and relative effect sizes is recommended                                                       | N/A <sup>2</sup> |
| Ancillary analyses                                      | 18  | Results of any other analyses performed, including subgroup analyses and adjusted analyses, distinguishing pre-specified from exploratory         | N/A <sup>2</sup> |
| Harms                                                   | 19  | All important harms or unintended effects in each group (for specific guidance see CONSORT for harms)                                             | N/A <sup>2</sup> |
| <b>Discussion</b>                                       |     |                                                                                                                                                   |                  |
| Limitations                                             | 20  | Trial limitations, addressing sources of potential bias, imprecision, and, if relevant, multiplicity of analyses                                  | 13               |
| Generalisability                                        | 21  | Generalisability (external validity, applicability) of the trial findings                                                                         | 12               |
| Interpretation                                          | 22  | Interpretation consistent with results, balancing benefits and harms, and considering other relevant evidence                                     | 12               |
| <b>Other information</b>                                |     |                                                                                                                                                   |                  |
| Registration                                            | 23  | Registration number and name of trial registry                                                                                                    | 3                |
| Protocol                                                | 24  | Where the full trial protocol can be accessed, if available                                                                                       | N/A <sup>3</sup> |
| Funding                                                 | 25  | Sources of funding and other support (such as supply of drugs), role of funders                                                                   | 14               |

<sup>1</sup> Please note that as this is a trial protocol, information on the numbers of participants actually recruited, numbers excluded at randomisation with reasons, number receiving the intervention, and number lost to follow-up with reasons do not yet apply. We have, however, provided an estimate of the total number of participants we hope to recruit and a likely estimate of proportion of total drop-outs within the text of the protocol.

<sup>2</sup> Again, as this is a trial protocol, items on the CONSORT statement relating to provision of baseline demographic data and outcome data do not yet apply.

<sup>3</sup> The submission relating to this CONSORT statement is the trial protocol.
